# Supplementary material for: The Chemical Composition and Functional Properties of Essential Oils from Four Species of Schisandra Growing Wild in the Qinling Mountains, China
Source: PubMed Central journal article supplement (PMC6100523; doi:10.3390/molecules23071645), 2018-07-05
Supplement: molecules-23-01645-s001.pdf [file molecules-23-01645-s001.pdf]

## SUPPLEMENTARY MATERIAL

### Chemical composition and functional properties of essential oils from four species of *Schisandra*, growing wild in Qinling Mountains, China

Xiaorui Wang<sup>1,3</sup> • Yan Liu<sup>2,3</sup> • Shichao Zhou<sup>2,3</sup> • Wei Gu<sup>1,2,3,\*</sup>

<sup>1</sup> National Engineering Laboratory for Resource Developing of Endangered Chinese Crude Drugs in Northwest of China, Shaanxi Normal University, Xi'an 710119, P.R. China; <sup>2</sup> Key Laboratory of Medicinal Resources and Natural Pharmaceutical Chemistry, Ministry of Education, Shaanxi Normal University, Xi'an 710119, P.R. China; <sup>3</sup> College of Life Sciences, Shaanxi Normal University, Xi'an 710119, P.R. China

Corresponding author: College of Life Sciences, Shaanxi Normal University, Xi'an, Shaanxi 710119, P.R. China. E-mail address: [weigu@snnu.edu.cn](mailto:weigu@snnu.edu.cn).

**Table S1.** Factors and levels for orthogonal test.

| Level | Factor   |         |        |       |
|-------|----------|---------|--------|-------|
|       | A (g/mL) | B (min) | C (°C) | D (W) |
| 1     | 1: 5     | 20      | 30     | 180   |
| 2     | 1: 7.5   | 30      | 35     | 210   |
| 3     | 1: 10    | 40      | 40     | 240   |

Note A: Ratio of material to solvent; B: Ultrasonic time; C: Ultrasonic temperature; D: Ultrasonic power.

**Table S2.** Results of L9 (3<sup>4</sup>) orthogonal test.

| Number              | Factor                                                      |         |        |       | Extraction rate (%) |
|---------------------|-------------------------------------------------------------|---------|--------|-------|---------------------|
|                     | A (g/mL)                                                    | B (min) | C (°C) | D (W) |                     |
| 1                   | 1                                                           | 1       | 1      | 1     | 5.96±0.33           |
| 2                   | 1                                                           | 2       | 2      | 2     | 3.73±0.22           |
| 3                   | 1                                                           | 3       | 3      | 3     | 3.81±0.15           |
| 4                   | 2                                                           | 1       | 2      | 3     | 5.23±0.45           |
| 5                   | 2                                                           | 2       | 3      | 1     | 5.39±0.18           |
| 6                   | 2                                                           | 3       | 1      | 2     | 4.22±0.30           |
| 7                   | 3                                                           | 1       | 3      | 2     | 2.19±0.22           |
| 8                   | 3                                                           | 2       | 1      | 3     | 6.07±0.32           |
| 9                   | 3                                                           | 3       | 2      | 1     | 3.16±0.19           |
| k1                  | 13.50                                                       | 13.38   | 16.25  | 14.51 |                     |
| k2                  | 14.84                                                       | 15.19   | 12.12  | 10.14 |                     |
| k3                  | 11.42                                                       | 11.19   | 11.39  | 15.11 |                     |
| K1                  | 4.50                                                        | 4.46    | 5.42   | 4.84  |                     |
| K2                  | 4.95                                                        | 5.06    | 4.04   | 3.38  |                     |
| K3                  | 3.81                                                        | 3.73    | 3.80   | 5.04  |                     |
| R                   | 1.14                                                        | 1.33    | 1.62   | 1.66  |                     |
| Factor sequence     | D>C>B>A                                                     |         |        |       |                     |
| Optimal combination | A <sub>3</sub> B <sub>2</sub> C <sub>1</sub> D <sub>3</sub> |         |        |       |                     |

Note SD: standard deviation; A: Ratio of material to solvent; B: Ultrasonic time; C: Ultrasonic temperature; D: Ultrasonic power.

**Table S3.** The table of variance analysis.

| Factor | Sum of Squares | Degree of freedom | Mean square | F    | Significance |
|--------|----------------|-------------------|-------------|------|--------------|
| A      | 7.80           | 2                 | 3.90        | 1.36 |              |
| B      | 10.26          | 2                 | 5.13        | 1.79 |              |
| C      | 11.86          | 2                 | 5.93        | 2.07 |              |
| D      | 16.46          | 2                 | 8.23        | 2.87 | *            |
| error  | 51.68          |                   | 2.87        |      |              |
| sum    | 5707.91        |                   |             |      |              |

Note A: Ratio of material to solvent; B: Ultrasonic time; C: Ultrasonic temperature; D: Ultrasonic power; \*: P < 0.05.

**Table S4.** Chemical compounds identified in the volatile oils of four species of *Schisandra*.

| No.                   | Name                                | Molecular formula                              | RC <sup>b</sup> (%) ± SD |              |              |              | RI <sup>a</sup> |
|-----------------------|-------------------------------------|------------------------------------------------|--------------------------|--------------|--------------|--------------|-----------------|
|                       |                                     |                                                | SG                       | SR           | SS           | SP           |                 |
| <b>Alkanes</b>        |                                     |                                                | <b>4.45</b>              | <b>6.25</b>  | <b>3.69</b>  | <b>6.32</b>  |                 |
| 1                     | 2,4-Dimethylheptane                 | C <sub>9</sub> H <sub>20</sub>                 | 0.11±0.00                | 0.50±0.18    | 0.66±0.18    | -            | 821             |
| 2                     | 4-Methyloctane                      | C <sub>9</sub> H <sub>20</sub>                 | 1.83±0.42                | 1.09±0.19    | 0.67±0.58    | 2.11±1.21    | 863             |
| 3                     | 2,6-Dimethylundecane                | C <sub>13</sub> H <sub>28</sub>                | 0.25±0.17                | 0.75±0.25    | -            | 0.75±0.47    | 1210            |
| 4                     | 2,6-Dimethylnonane                  | C <sub>11</sub> H <sub>24</sub>                | -                        | -            | 0.28±0.08    | -            | 1026            |
| 5                     | 3,8-Dimethylundecane                | C <sub>13</sub> H <sub>28</sub>                | -                        | 1.91±0.53    | 0.44±0.08    | -            | 1227            |
| 6                     | 6-ethyl-2-methyl octane             | C <sub>11</sub> H <sub>24</sub>                | -                        | -            | -            | 0.73±0.23    | 1037            |
| 7                     | 1-Phenyl-1-methylbutane             | C <sub>11</sub> H <sub>16</sub>                | -                        | -            | -            | 0.26±0.07    | 1098            |
| 8                     | 2,4,6-Trimethyloctane               | C <sub>11</sub> H <sub>24</sub>                | 1.29±0.31                | 2.00±1.19    | 1.20±1.08    | 1.73±1.04    | 1058            |
| 9                     | 2,7,10-Trimethyl dodecane           | C <sub>15</sub> H <sub>32</sub>                | 0.97±0.42                | -            | 0.28±0.01    | 0.74±0.54    | 1368            |
| 10                    | 6-Methyltridecane                   | C <sub>14</sub> H <sub>30</sub>                | -                        | -            | 0.16±0.00    | -            | 1316            |
| <b>Ketone</b>         |                                     |                                                | <b>1.62</b>              | <b>-</b>     | <b>0.85</b>  | <b>-</b>     |                 |
| 11                    | 2-Benzyl-3-isopropyl-cyclopentanone | C <sub>15</sub> H <sub>20</sub> O              | 1.62±0.08                | -            | -            | -            | 1808            |
| 12                    | $\beta$ -Ionone                     | C <sub>13</sub> H <sub>20</sub> O              | -                        | -            | 0.63±0.00    | -            | 1485            |
| 13                    | Phenacyl acetate                    | C <sub>11</sub> H <sub>10</sub> O <sub>3</sub> | -                        | -            | 0.22±0.07    | -            | 1541            |
| <b>Sesquiterpenes</b> |                                     |                                                | <b>59.64</b>             | <b>42.09</b> | <b>30.43</b> | <b>52.41</b> |                 |
| 14                    | $\alpha$ -Santalene                 | C <sub>15</sub> H <sub>24</sub>                | -                        | -            | 8.32±0.01    | 0.58±0.33    | 1211            |
| 15                    | Cuparene                            | C <sub>15</sub> H <sub>24</sub>                | -                        | -            | 0.58±0.08    | 0.25±0.00    | 1556            |
| 16                    | $\alpha$ -Bisabolene                | C <sub>15</sub> H <sub>24</sub>                | -                        | 0.34±0.16    | 0.40±0.31    | 0.55±0.17    | 1443            |
| 17                    | Cadinene                            | C <sub>15</sub> H <sub>24</sub>                | -                        | -            | 0.38±0.08    | -            | 1440            |
| 18                    | $\alpha$ -Muurolene                 | C <sub>15</sub> H <sub>24</sub>                | -                        | -            | 0.50±0.07    | 11.05±2.11   | 1497            |
| 19                    | $\alpha$ -Amorphene                 | C <sub>15</sub> H <sub>24</sub>                | -                        | 1.27±0.20    | 0.55±0.20    | 0.31±0.05    | 1482            |

| No. | Name                        | Molecular<br>formula            | RC <sup>b</sup> (%) ± SD |           |           |            | RI <sup>a</sup> |
|-----|-----------------------------|---------------------------------|--------------------------|-----------|-----------|------------|-----------------|
|     |                             |                                 | SG                       | SR        | SS        | SP         |                 |
| 20  | Ylangene                    | C <sub>15</sub> H <sub>24</sub> | 10.81±1.45               | 3.90±0.63 | 2.60±0.06 | 1.90±0.10  | 1407            |
| 21  | β-Himachalene               | C <sub>15</sub> H <sub>24</sub> | 2.18±0.09                | 0.98±0.59 | 2.81±0.06 | 2.12±0.50  | 1547            |
| 22  | δ-Elemene                   | C <sub>15</sub> H <sub>24</sub> | -                        | 2.13±1.10 | -         | -          | 1377            |
| 23  | β-Bisabolene                | C <sub>15</sub> H <sub>24</sub> | 0.25±0.00                | 0.82±0.45 | -         | 0.12±0.00  | 1506            |
| 24  | β-Sesquiphellandrene        | C <sub>15</sub> H <sub>24</sub> | 1.33±0.43                | -         | -         | -          | 1525            |
| 25  | γ-Muurolene                 | C <sub>15</sub> H <sub>24</sub> | 0.63±0.00                | -         | 2.35±0.06 | -          | 1474            |
| 26  | Isosativene                 | C <sub>15</sub> H <sub>24</sub> | -                        | 0.33±0.12 | -         | 0.36±0.05  | 1417            |
| 27  | α-Cedrene                   | C <sub>15</sub> H <sub>24</sub> | 0.20±0.00                | -         | 0.28±0.19 | -          | 1408            |
| 28  | γ-Cadinene                  | C <sub>15</sub> H <sub>24</sub> | -                        | -         | 2.15±0.27 | 1.77±0.28  | 1435            |
| 29  | δ-Cadinene                  | C <sub>15</sub> H <sub>24</sub> | -                        | -         | 2.45±0.13 | -          | 1519            |
| 30  | α-Longipinene               | C <sub>15</sub> H <sub>24</sub> | -                        | 0.50±0.13 | 0.15±0.02 | 7.79±1.62  | 1334            |
| 31  | α-Bergamotene               | C <sub>15</sub> H <sub>24</sub> | 1.08±0.24                | 0.58±0.38 | 0.58±0.05 | 0.39±0.19  | 1433            |
| 32  | α-Caryophyllene             | C <sub>15</sub> H <sub>24</sub> | -                        | 0.34±0.05 | -         | -          | 1452            |
| 33  | Germacrene D                | C <sub>15</sub> H <sub>24</sub> | 1.25±0.39                | 0.82±0.02 | 1.29±0.13 | 0.79±0.13  | 1515            |
| 34  | α-Ylangene                  | C <sub>15</sub> H <sub>24</sub> | -                        | 1.14±0.03 | -         | -          | 1373            |
| 35  | Elixene                     | C <sub>15</sub> H <sub>24</sub> | 2.19±1.59                | 0.50±0.03 | -         | -          | 1445            |
| 36  | 4,5-dehydro- Isolongifolene | C <sub>15</sub> H <sub>22</sub> | -                        | 3.73±0.08 | -         | -          | 1393            |
| 37  | Caryophyllene               | C <sub>15</sub> H <sub>24</sub> | 3.11±0.11                | 4.00±1.14 | 2.32±0.43 | 13.88±1.17 | 1494            |
| 38  | γ-Elemene                   | C <sub>15</sub> H <sub>24</sub> | -                        | 1.81±0.03 | -         | 2.26±0.46  | 1465            |
| 39  | δ-Guaiene                   | C <sub>15</sub> H <sub>24</sub> | 4.68±0.15                | 2.10±0.28 | 0.93±0.11 | 4.25±0.76  | 1505            |
| 40  | Muurolene                   | C <sub>15</sub> H <sub>24</sub> | 7.49±0.18                | 7.45±0.12 | -         | -          | 1469            |
| 41  | β-Chamigrene                | C <sub>15</sub> H <sub>24</sub> | -                        | 2.63±0.26 | 0.73±0.46 | 0.19±0.00  | 1478            |
| 42  | β-Caryophyllene             | C <sub>15</sub> H <sub>24</sub> | 3.52±0.31                | -         | -         | -          | 1423            |
| 43  | α-Bulnesene                 | C <sub>15</sub> H <sub>24</sub> | -                        | 2.71±0.71 | -         | -          | 1508            |

| No. | Name                                     | Molecular formula                 | RC <sup>b</sup> (%) ± SD |              |              |              | RI <sup>a</sup> |
|-----|------------------------------------------|-----------------------------------|--------------------------|--------------|--------------|--------------|-----------------|
|     |                                          |                                   | SG                       | SR           | SS           | SP           |                 |
| 44  | $\alpha$ -Farnesene                      | C <sub>15</sub> H <sub>24</sub>   | -                        | 1.31±0.19    | -            | -            | 1509            |
| 45  | Isocaryophyllene                         | C <sub>15</sub> H <sub>24</sub>   | 12.50±4.36               | -            | -            | -            | 1411            |
| 46  | $\alpha$ -Humulene                       | C <sub>15</sub> H <sub>24</sub>   | 3.25±1.18                | 0.89±0.01    | -            | 1.15±0.11    | 1579            |
| 47  | $\alpha$ -Chamigrene                     | C <sub>15</sub> H <sub>24</sub>   | -                        | -            | -            | 1.34±0.17    | 1514            |
| 48  | $\alpha$ -Guaiene                        | C <sub>15</sub> H <sub>24</sub>   | 4.51±0.22                | -            | -            | -            | 1413            |
| 49  | Germacrene B                             | C <sub>15</sub> H <sub>24</sub>   | -                        | 1.13±0.30    | 0.69±0.06    | 0.99±0.21    | 1431            |
| 50  | $\beta$ -Santalene                       | C <sub>15</sub> H <sub>24</sub>   | 0.66±0.35                | 0.68±0.13    | 0.37±0.19    | 0.37±0.11    | 1425            |
|     | <b>Oxygenated sesquiterpenes</b>         |                                   | <b>15.82</b>             | <b>37.30</b> | <b>51.65</b> | <b>22.70</b> |                 |
| 51  | 3,7,11-Trimethyl-2,6,10-dodecatrien-1-ol | C <sub>15</sub> H <sub>26</sub> O | 1.59±0.31                | 2.09±0.57    | 0.61±0.74    | 0.58±0.07    | 1695            |
| 52  | $\delta$ -Cadinol                        | C <sub>15</sub> H <sub>26</sub> O | -                        | 1.53±0.48    | 0.75±0.03    | 0.45±0.04    | 1652            |
| 53  | Nerolidol                                | C <sub>15</sub> H <sub>26</sub> O | 2.58±0.92                | 2.47±0.56    | 0.83±0.37    | 4.59±1.22    | 1564            |
| 54  | Humulane-1,6-dien-3-ol                   | C <sub>15</sub> H <sub>26</sub> O | -                        | 0.93±0.03    | -            | -            | 1619            |
| 55  | Germacrene D-4-ol                        | C <sub>15</sub> H <sub>26</sub> O | -                        | -            | 0.68±0.20    | -            | 1569            |
| 56  | D-nerolidol                              | C <sub>15</sub> H <sub>26</sub> O | 1.45±0.19                | -            | -            | -            | 1532            |
| 57  | $\alpha$ -Cadinol                        | C <sub>15</sub> H <sub>26</sub> O | 0.80±0.13                | -            | 0.21±0.02    | -            | 1650            |
| 58  | Farnesyl alcohol                         | C <sub>15</sub> H <sub>26</sub> O | -                        | 1.58±0.34    | 0.29±0.04    | 4.30±2.04    | 1713            |
| 59  | Muurolol                                 | C <sub>15</sub> H <sub>26</sub> O | -                        | 0.64±0.05    | -            | -            | 1644            |
| 60  | trans-Nerolidol                          | C <sub>15</sub> H <sub>26</sub> O | 0.63±0.06                | -            | -            | 1.98±0.36    | 1551            |
| 61  | Elemol                                   | C <sub>15</sub> H <sub>26</sub> O | -                        | 15.08±0.20   | -            | -            | 1537            |
| 62  | Farnesol                                 | C <sub>15</sub> H <sub>26</sub> O | 0.17±0.00                | -            | 0.27±0.15    | 0.52±0.20    | 1416            |
| 63  | $\alpha$ -Bisabolol                      | C <sub>15</sub> H <sub>26</sub> O | 1.61±0.48                | 0.71±0.35    | 1.50±1.14    | 1.93±0.60    | 1680            |
| 64  | $\alpha$ -Santalol                       | C <sub>15</sub> H <sub>24</sub> O | -                        | 2.08±0.04    | 4.29±5.33    | -            | 1454            |
| 65  | trans-Farnesol                           | C <sub>15</sub> H <sub>26</sub> O | 1.55±1.84                | -            | 0.25±0.12    | 0.43±0.24    | 1722            |
| 66  | Spathulenol                              | C <sub>15</sub> H <sub>24</sub> O | 0.40±0.00                | 2.65±0.05    | 2.98±0.28    | 1.21±0.10    | 1536            |

| No.                         | Name                                     | Molecular formula                              | RC <sup>b</sup> (%) ± SD |              |              |              | RI <sup>a</sup> |
|-----------------------------|------------------------------------------|------------------------------------------------|--------------------------|--------------|--------------|--------------|-----------------|
|                             |                                          |                                                | SG                       | SR           | SS           | SP           |                 |
| 67                          | Cedrenol                                 | C <sub>15</sub> H <sub>24</sub> O              | -                        | -            | 10.43±1.06   | -            | 1604            |
| 68                          | Longiverbenone                           | C <sub>15</sub> H <sub>22</sub> O              | -                        | -            | 10.72±1.35   | -            | 1651            |
| 69                          | α-Bisabolene epoxide                     | C <sub>15</sub> H <sub>24</sub> O              | -                        | 0.18±0.00    | 0.12±0.00    | -            | 1531            |
| 70                          | Isospathulenol                           | C <sub>15</sub> H <sub>24</sub> O              | -                        | 2.98±0.10    | 11.37±0.92   | 1.08±0.01    | 1582            |
| 71                          | Cedr-8-en-15-ol                          | C <sub>15</sub> H <sub>26</sub> O <sub>3</sub> | 1.07±0.22                | -            | -            | 0.73±0.09    | 1646            |
| 72                          | Epiglobulol                              | C <sub>15</sub> H <sub>24</sub> O              | 1.91±1.57                | -            | -            | -            | 1530            |
| 73                          | Caryophyllene epoxide                    | C <sub>15</sub> H <sub>24</sub> O              | -                        | 1.62±0.04    | 0.44±0.01    | 0.76±0.06    | 1507            |
| 74                          | β-Santalol                               | C <sub>15</sub> H <sub>24</sub> O              | 1.18±0.91                | 0.50±0.28    | 0.46±0.08    | 0.89±0.61    | 1724            |
| 75                          | Ledene oxide                             | C <sub>15</sub> H <sub>24</sub> O              | -                        | 1.25±1.54    | 0.41±0.00    | 1.01±0.11    | 2062            |
| 76                          | Santalol                                 | C <sub>15</sub> H <sub>24</sub> O              | 0.88±0.21                | 1.01±0.36    | 5.04±4.51    | 2.24±0.18    | 1617            |
|                             | <b>Esters</b>                            |                                                | <b>2.51</b>              | <b>1.73</b>  | <b>3.42</b>  | <b>2.74</b>  |                 |
| 77                          | Oxalic acid, allyl hexadecyl ester       | C <sub>21</sub> H <sub>38</sub> O <sub>4</sub> | -                        | -            | 0.78±0.38    | -            | 2342            |
| 78                          | Oxalic acid, cyclobutyl tridecyl ester   | C <sub>19</sub> H <sub>34</sub> O <sub>4</sub> | 1.38±0.70                | 1.73±1.47    | 1.00±0.21    | 1.92±0.62    | 2179            |
| 79                          | Allethrin                                | C <sub>19</sub> H <sub>26</sub> O <sub>3</sub> | 0.57±0.41                | -            | 0.75±0.60    | -            | 2065            |
| 80                          | Oxalic acid, cyclobutyl tetradecyl ester | C <sub>20</sub> H <sub>36</sub> O <sub>4</sub> | -                        | -            | 0.89±0.62    | 0.82±0.10    | 2217            |
| 81                          | Ferulic acid methyl ester                | C <sub>11</sub> H <sub>12</sub> O <sub>4</sub> | 0.56±0.00                | -            | -            | -            | 1855            |
|                             | <b>Alcohols</b>                          |                                                | <b>1.85</b>              | <b>0.40</b>  | <b>0.82</b>  | <b>2.36</b>  |                 |
| 82                          | 4-Methylcholesta-8,24-dien-3-ol          | C <sub>28</sub> H <sub>46</sub> O              | -                        | -            | 0.51±0.29    | 0.89±0.06    | 3115            |
| 83                          | 3,4-Dimethyl-5-hexen-3-ol                | C <sub>8</sub> H <sub>16</sub> O               | -                        | -            | -            | 0.30±0.06    | 993             |
| 84                          | 3-Butyn-1-ol                             | C <sub>4</sub> H <sub>6</sub> O                | 1.85±0.24                | -            | 0.31±0.68    | 0.23±0.41    | 660             |
| 85                          | 13-Heptadecyn-1-ol                       | C <sub>17</sub> H <sub>32</sub> O <sub>2</sub> | -                        | 0.40±0.42    | -            | 0.61±0.29    | 1784            |
| 86                          | 3,3-Dimethylcyclohexanol                 | C <sub>8</sub> H <sub>16</sub> O               | -                        | -            | -            | 0.33±0.08    | 1392            |
| <b>Total identified (%)</b> |                                          |                                                | <b>85.89</b>             | <b>87.77</b> | <b>90.86</b> | <b>86.53</b> |                 |

Note SD: standard deviation; a: Retention index on RTX-5MS capillary column; b: Relative composition; -: Not detected.
